# Supplementary material for: Effect of cathode on crosstalk in Si-based lithium-ion cells
Source: Royal Society of Chemistry journal article supplement (doi:10.1039/d1ta06304a), 2021-01-01
Supplement: d1ta06304a1.pdf [file d1ta06304a1.pdf]

## Effect of cathode on crosstalk in Si-based lithium-ion cells

Minkyu Kim, Zhenzhen Yang\*, Seoung-Bum Son, Stephen E. Trask, Andrew Jansen, Ira Bloom\*

Chemical Science and Engineering Division, Argonne National Laboratory, 9700 South Cass Avenue, Lemont, IL 60439, USA

\* Corresponding author: [yangzhzh@anl.gov](mailto:yangzhzh@anl.gov), [ira.bloom@anl.gov](mailto:ira.bloom@anl.gov)

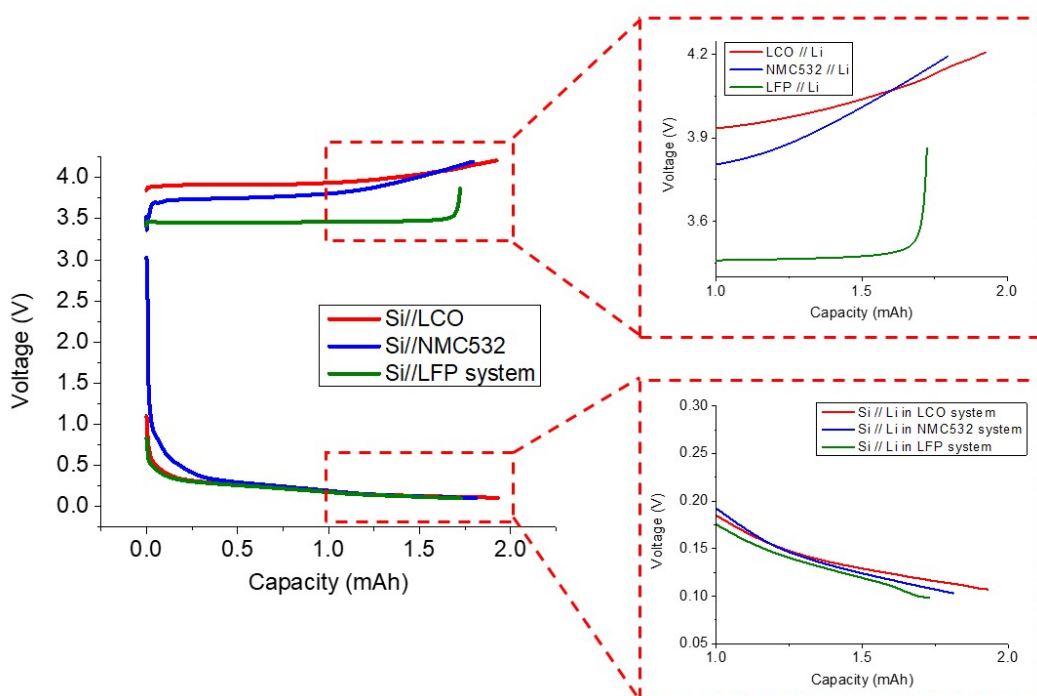

**Figure S1.** Voltage profiles of the Si electrode or cathode vs. the Li reference electrode from the three systems during the 1<sup>st</sup> cycle at the formation process.

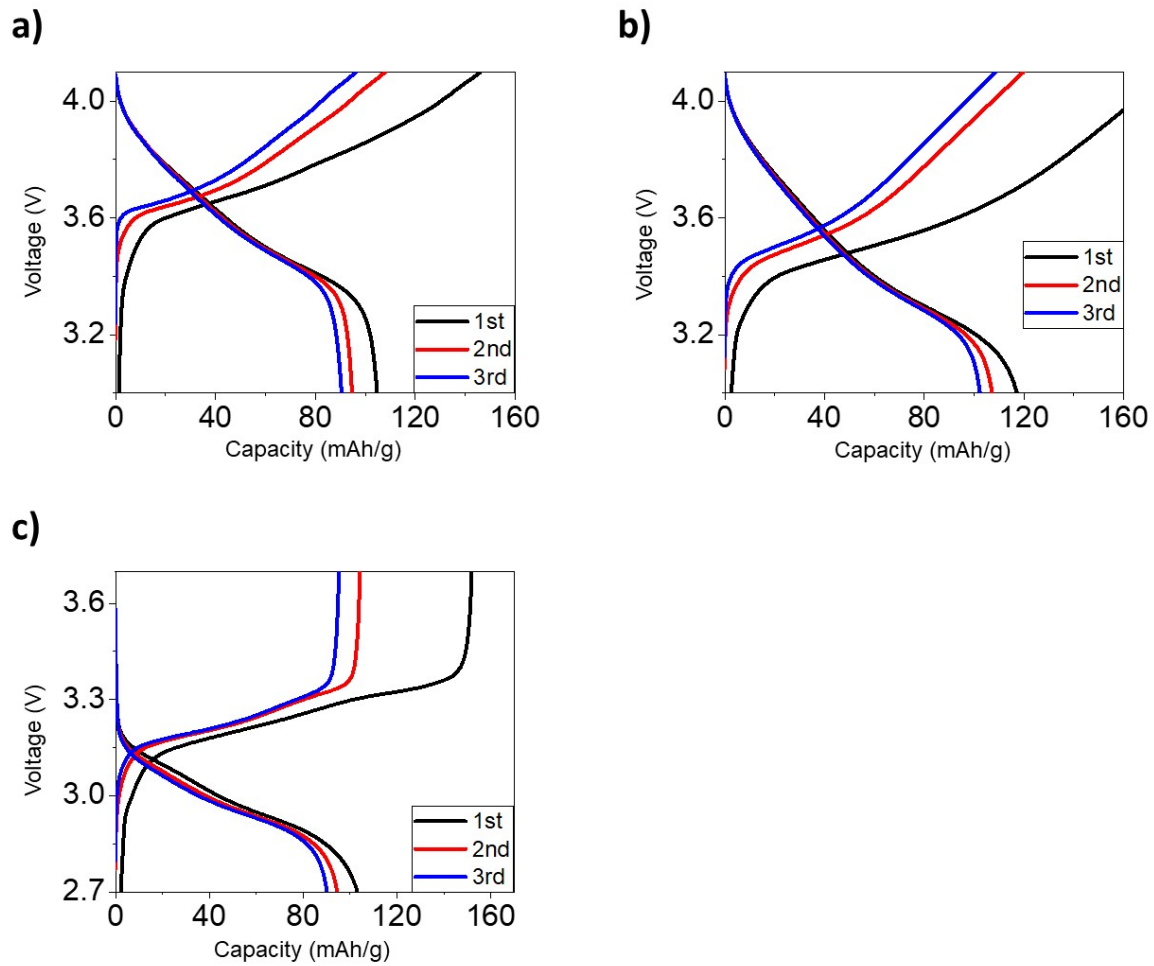

**Figure S2.** Voltage profiles of a) LCO system, b) NMC532 system, and c) LFP system during the formation process (3 cycles at the C/20 rate).

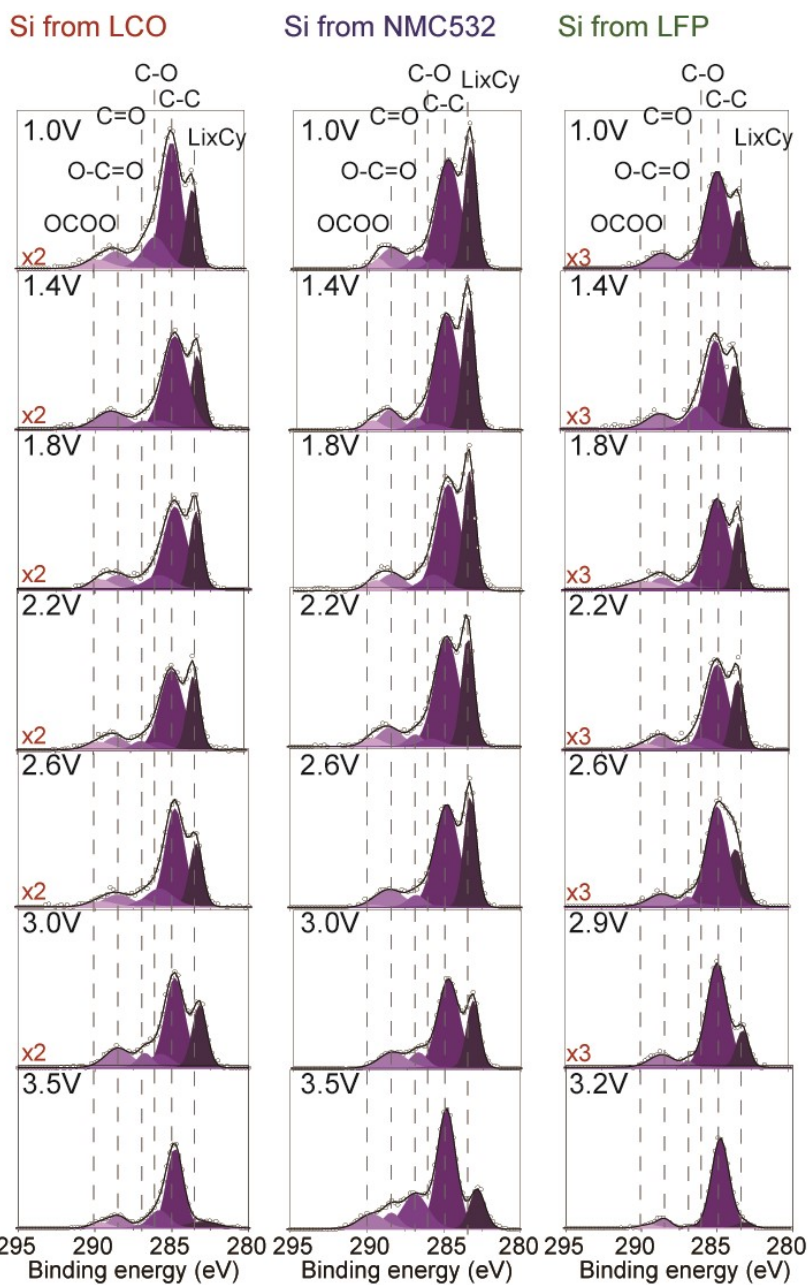

**Figure S3. The C 1s XPS spectra of harvested Si extracted from the LCO, NMC532, or LFP system, depending on the pre-set potentials. Black empty circles: measured data. Colored areas: fitted curves of observed components. Black solid lines: envelopes of the fitted curves. “x number” means the intensity multiplied by a factor of *number* to better show the peaks.**

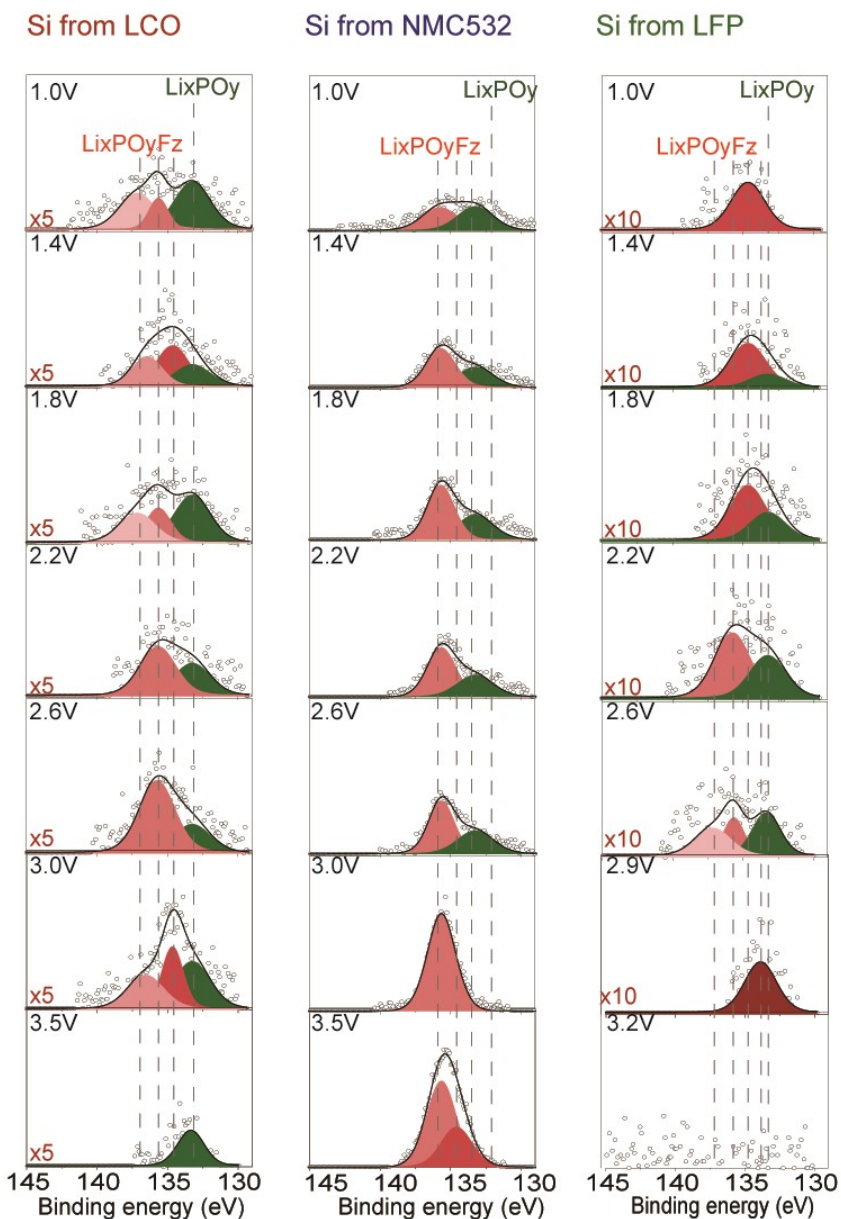

**Figure S4. The P2p XPS spectra of harvested Si anodes as a function of charge voltage.** Black empty circles: measured data. Colored areas: fitted curves of observed components. Black solid lines: envelopes of the fitted curves. “x number” means the intensity multiplied by a factor of *number* to better show the peaks.

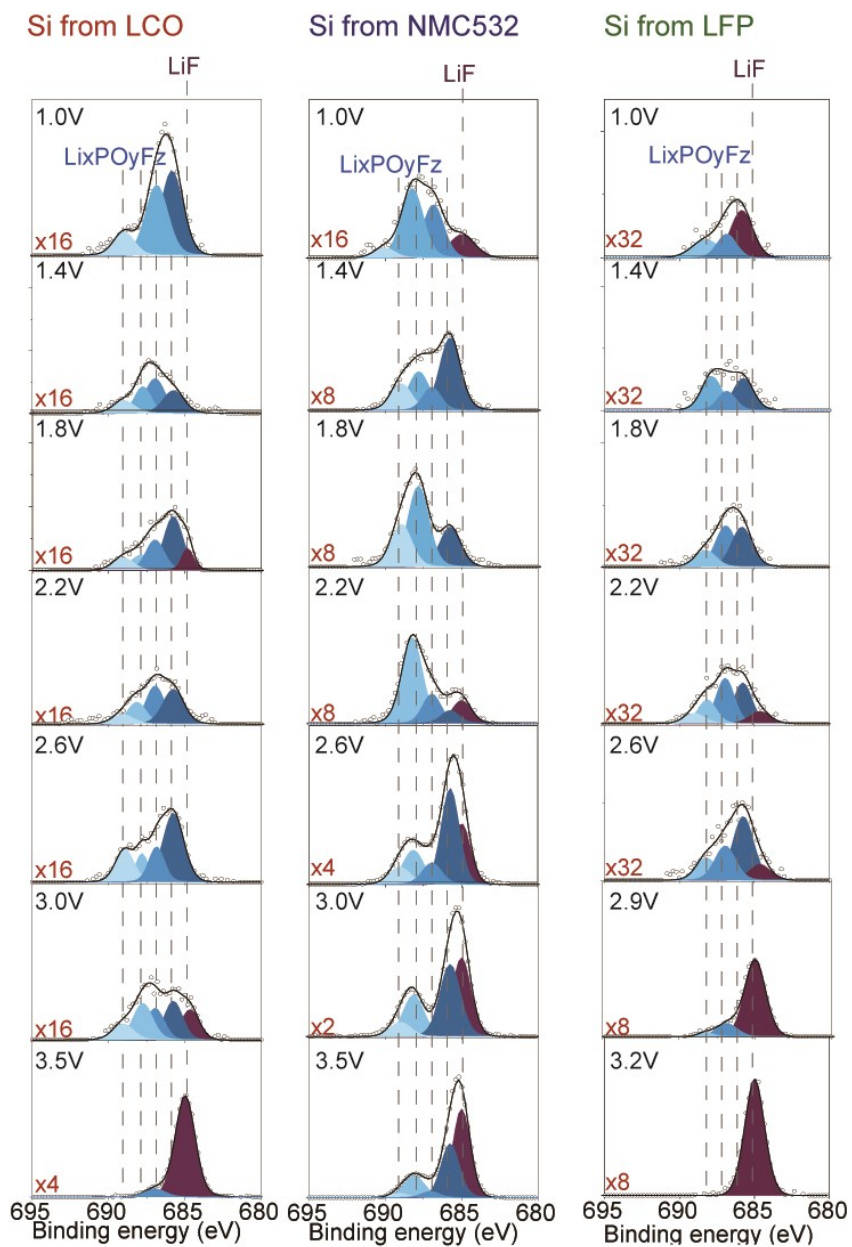

**Figure S5. The F1s XPS spectra of harvested Si anodes as a function of charge voltage.** Black empty circles: measured data. Colored areas: fitted curves of observed components. Black solid lines: envelopes of the fitted curves. “x number” means the intensity multiplied by a factor of *number* to better show the peaks.

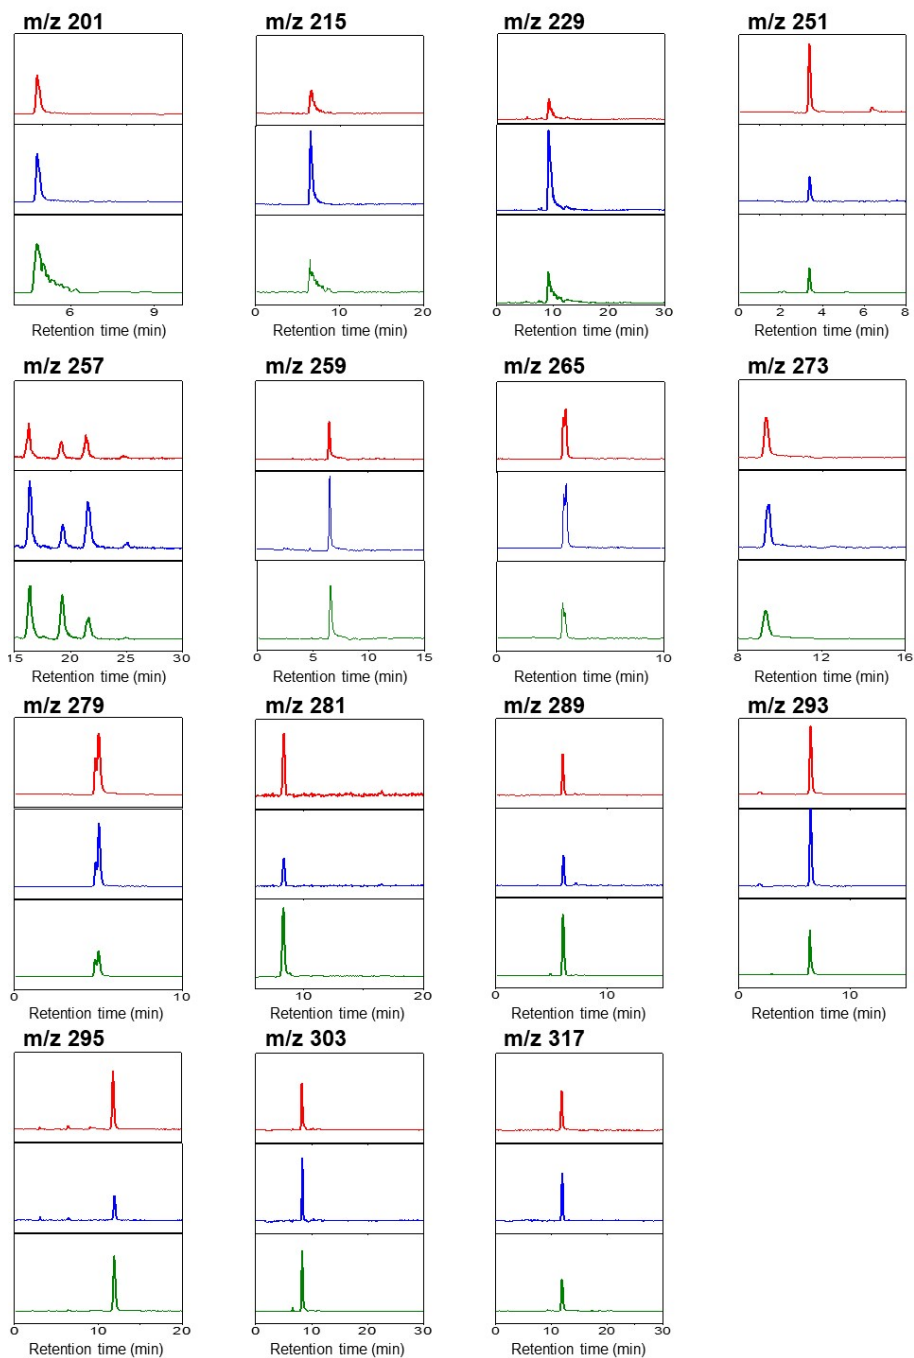

**Figure S6.** Single-ion chromatograms (SICs) of the aged electrolytes extracted from three systems (Red: LCO, Blue: NMC532, Green: LFP) after 2 cycles at the C/3 rate. Doublets or triplets seen in the SICs of some compounds are probably due to isomers.

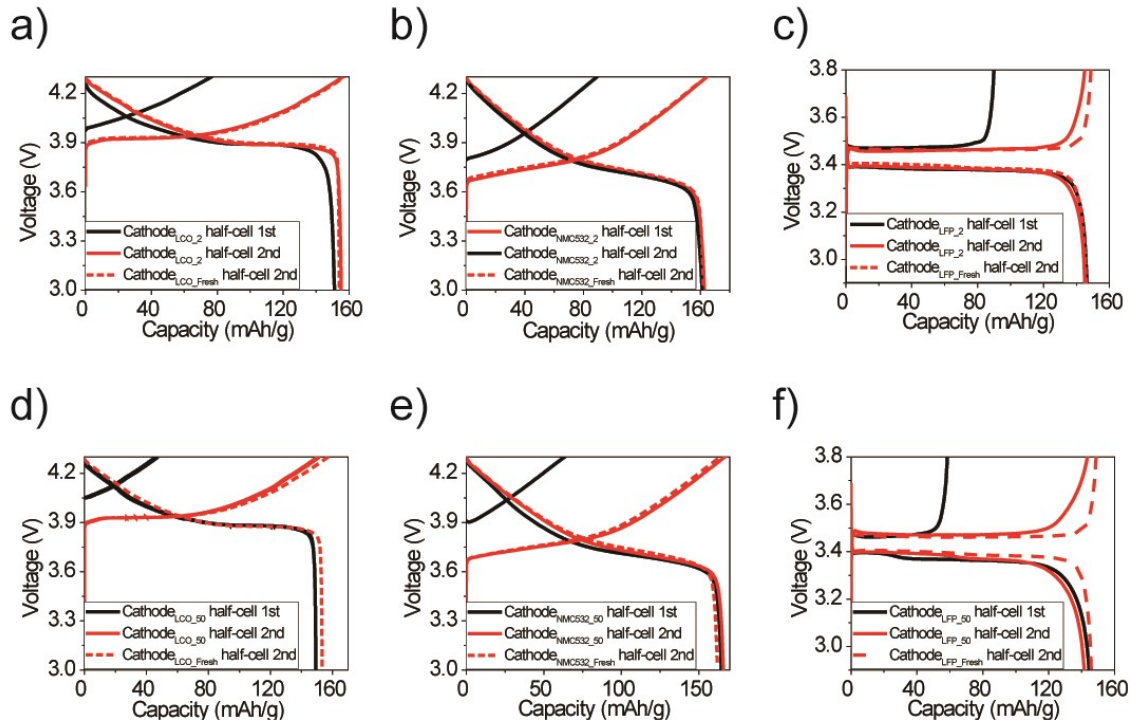

**Figure S7. The voltage profiles of harvested- and fresh-cathode/Li half-cells at the C/20 rate. Harvested cathodes come from each full cell system, a-c) after 2 cycles of cycle life test, d-f) after 50 cycles of cycle life test. a) harvested/fresh LCO half-cell, b) harvested/fresh NMC532 half-cell, c) harvested/fresh LFP half-cell. d) harvested/fresh LCO half-cell, e) harvested/fresh NMC532 half-cell, f) harvested/fresh LFP half-cell. Color code for figures: black lines represent the first cycle of the harvested-anode half-cells, and red lines represent the second cycle of the harvested-cathode half-cells. The second cycle of fresh-cathode half-cells (red, dashed lines) is included for reference.**

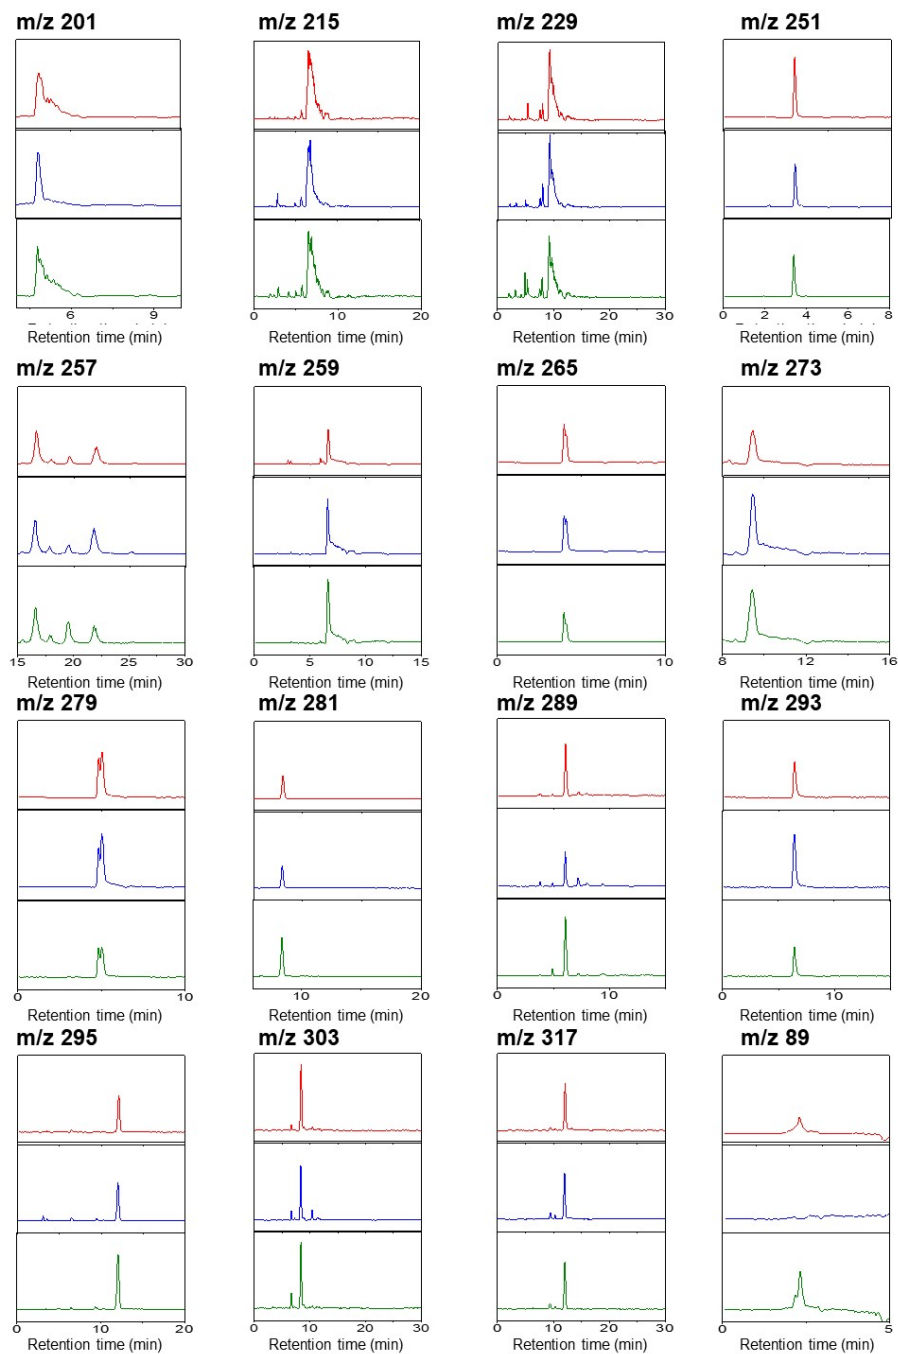

**Figure S8.** Single-ion chromatograms of the aged electrolytes extracted from the three cell systems (Red: LCO, Blue: NMC532, Green: LFP) after 50 cycles at the C/3 rate.



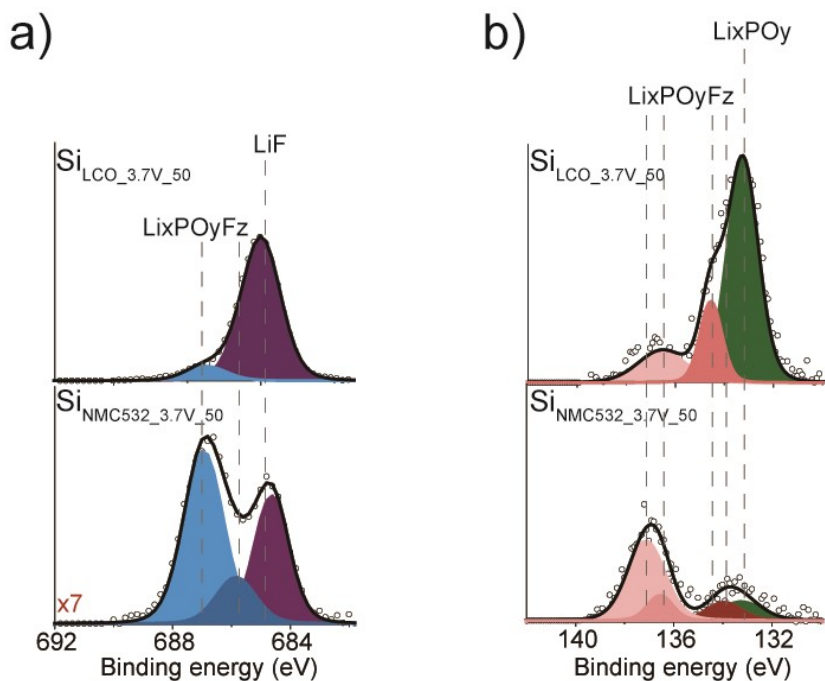

**Figure S9. XPS analysis of the harvested Si extracted from LCO and NMC532 systems after 50 cycles at the C/3 rate cycled between the voltage limits of 2.7 V and 3.7 V. a) F 1s spectra; b) P 2p spectra.** Black empty circles: measured data. Colored areas: fitted curves of observed components. Black solid lines: envelopes of the fitted curves. “x number” means the intensity multiplied by a factor of *number* to better show the peaks.

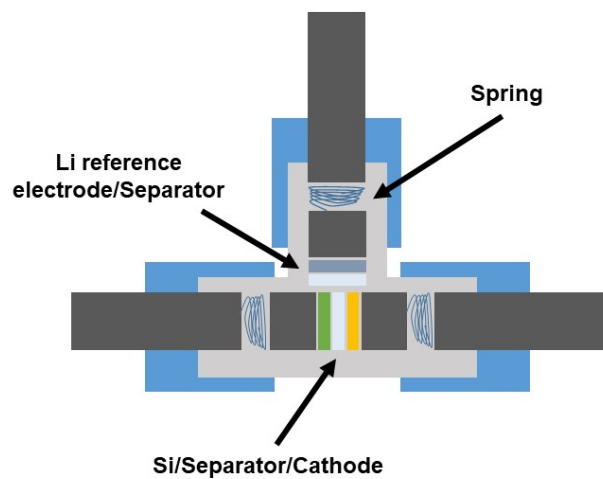

**Figure S10. Configuration of the three-electrode “T”-cell used in the experiments.** The dark gray rectangles in the schematic represent stainless steel rounds used as the current collectors.

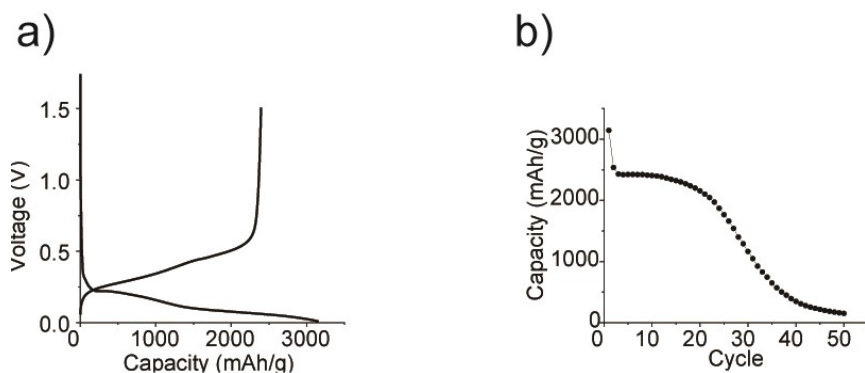

**Figure S11. Electrochemical properties of fresh Si//Li half-cell.** a) Capacity vs. Voltage curves of 1<sup>st</sup> cycle. Initial coulombic efficiency is ~76%. b) Cycle number vs. capacity curves during 50 cycles. C-rate was C/20, and potential window was between 0.01-1.5V.

**Table S1.** The 1<sup>st</sup> lithiation capacity and coulombic efficiency of three half-cells with harvested Si from each system after 2 cycles at the C/3 rate

| After 2 cycles at the C/3 rate                                 | Si <sub>LCO_2</sub> half-cell | Si <sub>NMC532_2</sub> half-cell | Si <sub>LFP_2</sub> half-cell |
|----------------------------------------------------------------|-------------------------------|----------------------------------|-------------------------------|
| The 1 <sup>st</sup> Lithiation capacity (mAh/g <sub>Si</sub> ) | 2316                          | 2646                             | 2687                          |
| Coulombic efficiency (%)                                       | 67.1                          | 88.7                             | 93.1                          |
| The 2 <sup>nd</sup> Lithiation capacity (mAh/g <sub>Si</sub> ) | 1359                          | 2345                             | 2569                          |
| Coulombic efficiency (%)                                       | 82.4                          | 89.1                             | 96.6                          |

**Table S2.** The amount of Li loss in each system, after 2 cycles at the C/3 rate. Capacity loss is defined as the difference in the 2<sup>nd</sup> charge capacity between fresh and harvested cathode half-cells in Fig. 6c–e.

| After 2 cycles at the C/3 rate                                                                   | LCO   | NMC532 | LFP   |
|--------------------------------------------------------------------------------------------------|-------|--------|-------|
| Absolute Li loss capacity (mAh)                                                                  | 1.695 | 1.215  | 1.025 |
| Li loss amount relative to the 2 <sup>nd</sup> charge capacity of fresh cathode/Li half cell (%) | 51.5  | 45.7   | 38.1  |

**Table S3.** The 1<sup>st</sup> lithiation capacity and coulombic efficiency of three half-cells with harvested Si from each system after 50 cycles at the C/3 rate

| After 50 cycles at the C/3 rate                                | Si <sub>LCO_50</sub> half-cell | Si <sub>NMC532_50</sub> half-cell | Si <sub>LFP_50</sub> half-cell |
|----------------------------------------------------------------|--------------------------------|-----------------------------------|--------------------------------|
| The 1 <sup>st</sup> Lithiation capacity (mAh/g <sub>Si</sub> ) | 1316                           | 1554                              | 2420                           |
| Coulombic efficiency (%)                                       | 24.3                           | 38.5                              | 74.8                           |

**Table S4.** The amount of Li loss in each system, after 50 cycles at the C/3 rate. Capacity loss is defined as the difference in the 2<sup>nd</sup> charge capacity between fresh and harvested cathode half-cells in Fig. 7c–e.

| After 50 cycles at the C/3 rate                                                                  | LCO   | NMC532 | LFP   |
|--------------------------------------------------------------------------------------------------|-------|--------|-------|
| Absolute Li loss capacity (mAh)                                                                  | 2.209 | 1.673  | 1.579 |
| Li loss amount relative to the 2 <sup>nd</sup> charge capacity of fresh cathode/Li half cell (%) | 69    | 61.9   | 59.3  |
